CORRECTION

## Correction: Polyamine biosynthesis and eIF5A hypusination are modulated by the DNA tumor virus KSHV and promote KSHV viral infection

Guillaume N. Fiches, Zhenyu Wu, Dawei Zhou, Ayan Biswas, Tai-Wei Li, Weili Kong, Maxime Jean, Netty G. Santoso, Jian Zhu

The eighth author, Netty G. Santoso, should be noted as co-corresponding author. Netty G. Santoso's email address is: [Netty.Santoso@osumc.edu](mailto:Netty.Santoso@osumc.edu).

### Reference

1. Fiches GN, Wu Z, Zhou D, Biswas A, Li T-W, Kong W, et al. Polyamine biosynthesis and eIF5A hypusination are modulated by the DNA tumor virus KSHV and promote KSHV viral infection. PLoS Pathog. 2022;18(4):e1010503. <https://doi.org/10.1371/journal.ppat.1010503> PMID: [35486659](https://pubmed.ncbi.nlm.nih.gov/35486659/)

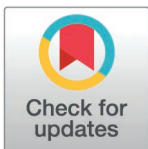

### OPEN ACCESS

**Citation:** Fiches GN, Wu Z, Zhou D, Biswas A, Li T-W, Kong W, et al. (2025) Correction: Polyamine biosynthesis and eIF5A hypusination are modulated by the DNA tumor virus KSHV and promote KSHV viral infection. PLoS Pathog 21(9): e1013496. <https://doi.org/10.1371/journal.ppat.1013496>

**Published:** September 11, 2025

**Copyright:** © 2025 Fiches et al. This is an open access article distributed under the terms of the [Creative Commons Attribution License](https://creativecommons.org/licenses/by/4.0/), which permits unrestricted use, distribution, and reproduction in any medium, provided the original author and source are credited.
